# Supplementary material for: Rapid Isolation of Functional ex vivo Human Skin Tissue-Resident Memory T Lymphocytes
Source: Front Immunol. 2021 Mar 22;12:624013. doi: 10.3389/fimmu.2021.624013 (PMC8019735; doi:10.3389/fimmu.2021.624013)
Supplement: Supplementary file 1 [file Data_Sheet_1.pdf]

## *Supplementary Material*

### 1 Supplementary Figures and Tables

#### 1.1 Supplementary Figures

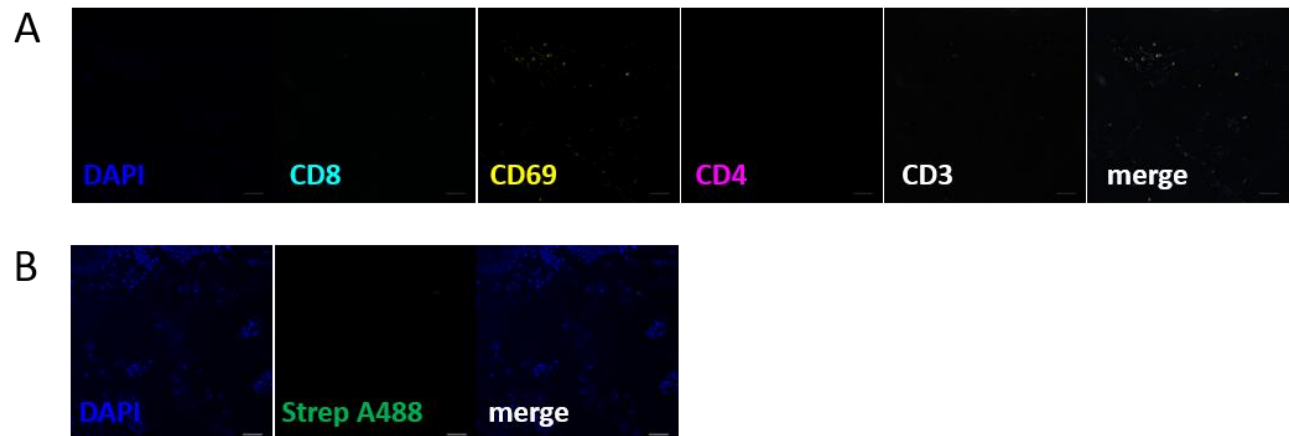

**Supplementary Figure 1. Controls in histological staining.** (A) Images of a skin section without primary antibody staining. (B) Images of a skin section with only secondary antibody streptavidin A488.

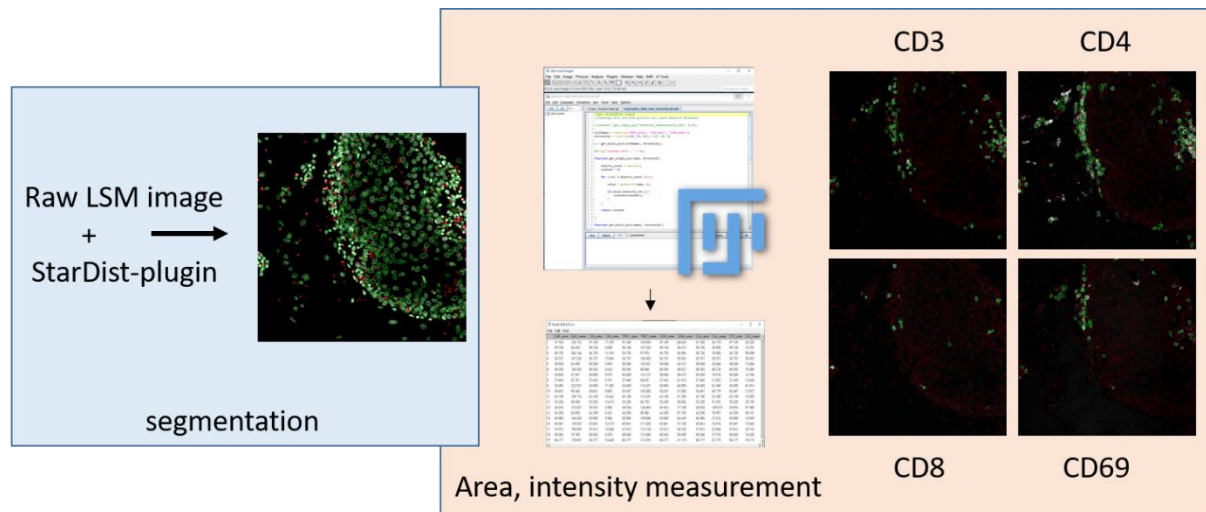

**Supplementary Figure 2.** Image based cell quantification in Fiji. The raw nuclei images (stained with DAPI) were used as input for the StarDist Plugin, finding single cell objects. With help of the found objects their mean area and channel dependent mean intensity were measured. Cell objects expressing mean intensity above the user defined threshold were counted as positive cell. Counting of co-expressing cells was performed by defining multiple thresholds.

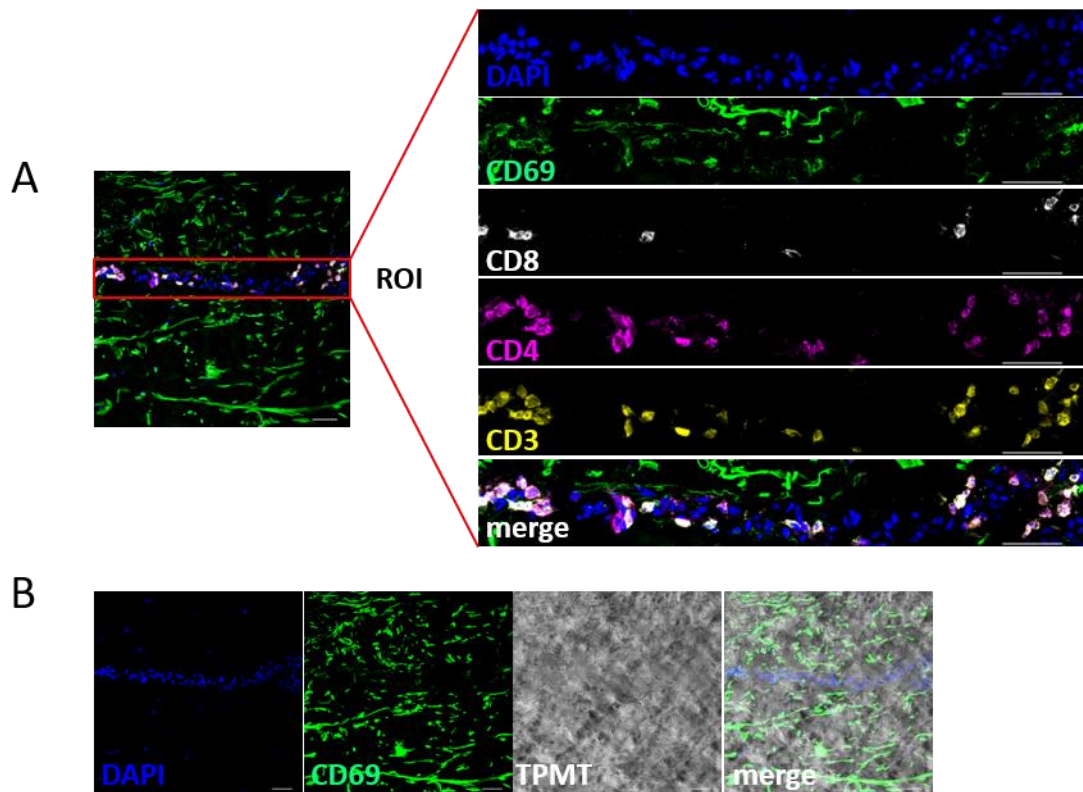

**Supplementary Figure 3. T cells in normal human abdominal skin.** (A) Images of an abdominal skin section stained with DAPI, CD69, CD8, CD4, CD3, or merged with all the markers. (B) Images of an abdominal skin section by CD69 staining overlap with transmitted light detector (TPMT).

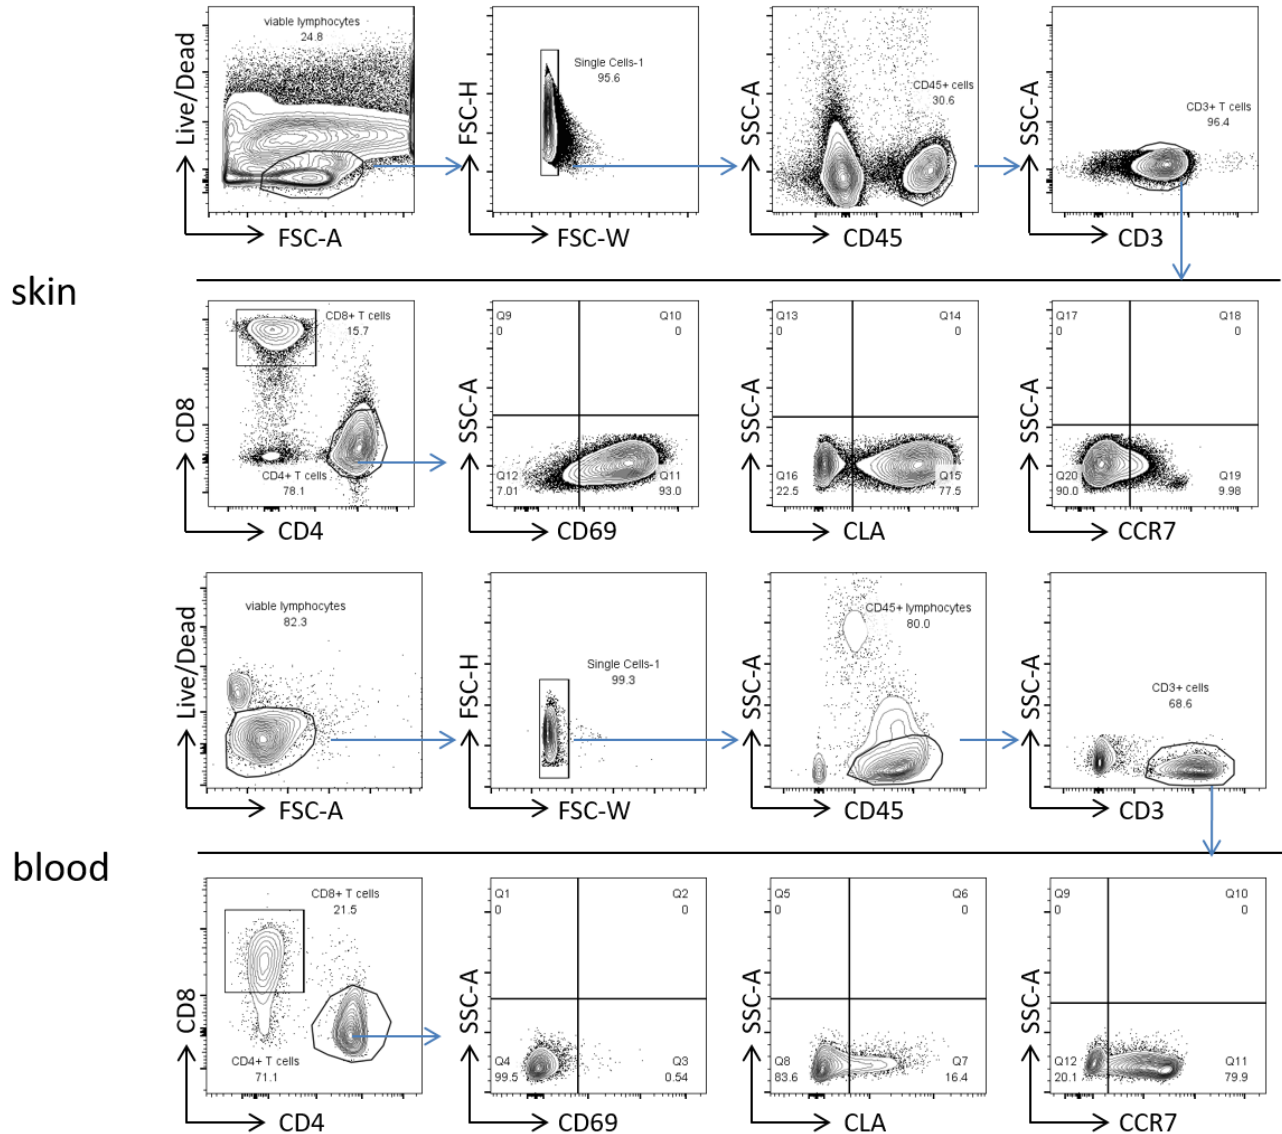

**Supplementary Figure 4. Gating strategy for analyzing *ex vivo* skin and blood T cells.** Viable lymphocytes were gated based on FSC-A against live/dead marker. Doublets were excluded and cells were then gated on CD45<sup>+</sup> and CD3<sup>+</sup> T cells. The expression levels of CD4, CD8, CD45RA, CD45RO, CD69, CLA, and CCR7 on T cells from skin and blood samples are shown. Data are representative of more than 10 independent experiments.

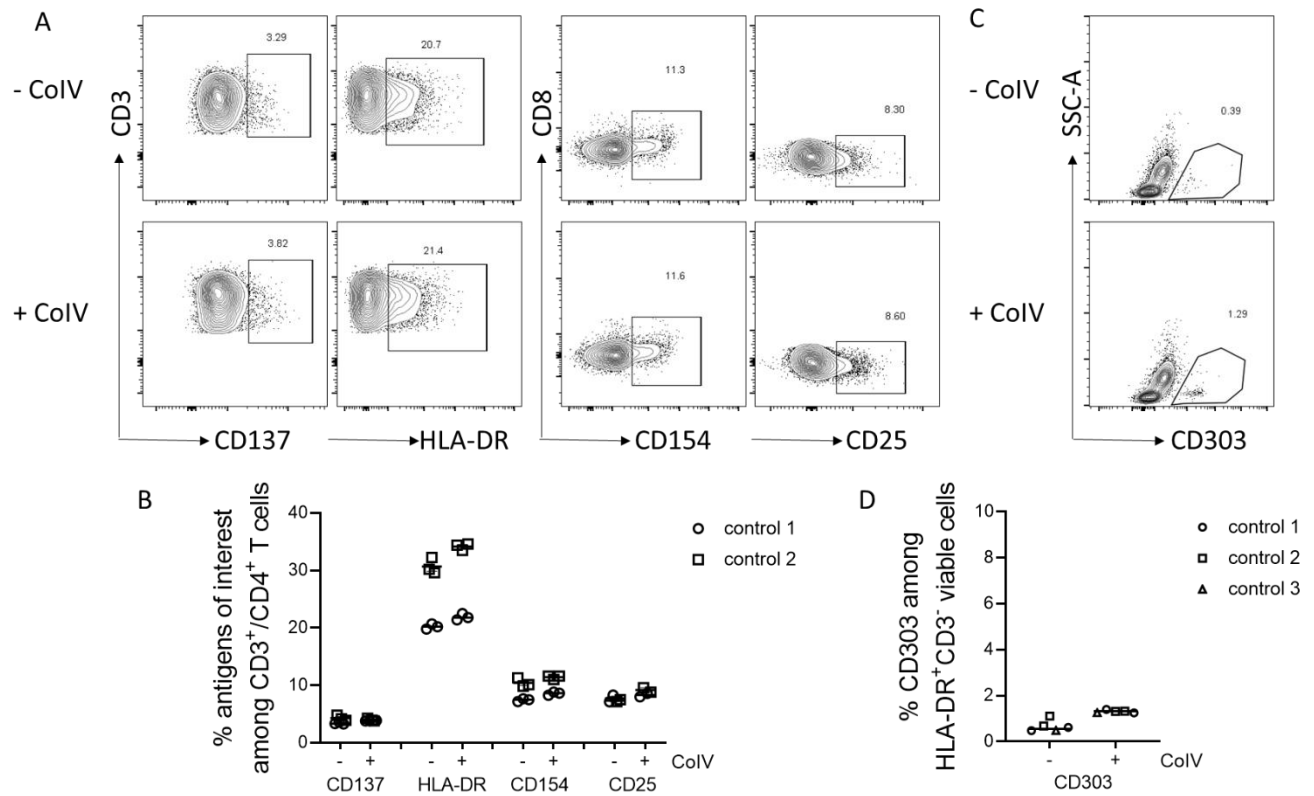

**Supplementary Figure 5. Collagenase IV digestion has minimum effects on the expression of antigens of interest on PBMCs.** PBMCs pre-activated with SEB for 12h (A, B) or directly ex vivo (C, D) were cultured in medium supplemented with (+ CoIV) or without (- CoIV) collagenase IV. Effects on the expression of activation markers by pre-activated cells are shown by representative plots (A) and by percentages among viable CD3<sup>+</sup> or CD4<sup>+</sup> T cells. Effects on the expression of CD303 on resting cells are shown by representative plots (C) and by percentages (D) among HLA-DR<sup>+</sup>CD3<sup>-</sup> viable cells.

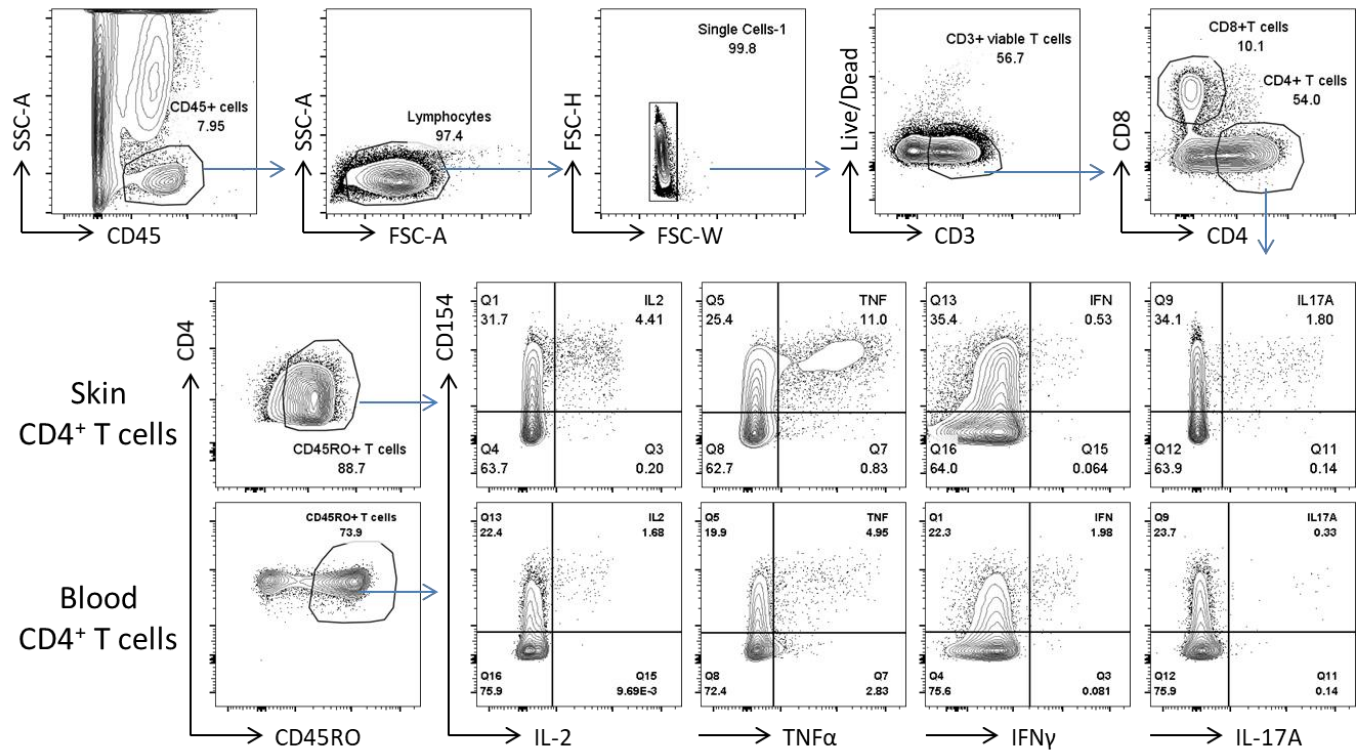

**Supplementary Figure 6. Gating strategy for analyzing cytokine production by ex vivo skin and paired blood T cells upon antigen stimulation.** Mononuclear cells isolated from blood as well as from skin cells by the M.CoIV\_6h protocol were stimulated with SEB for 7 hours, with Brefeldin A added during the last 2 hours. Cells were then fixed and stained with T cell lineage and cytokine markers. Viable CD3<sup>+</sup> T cells were gated on CD45<sup>+</sup> single lymphocytes followed by CD4<sup>+</sup> and CD8<sup>+</sup> T cells (upper row). The expression levels of cytokines including IL-2, TNF- $\alpha$ , IFN- $\gamma$  or IL-17A that co-express with CD154 on CD45RO memory CD4<sup>+</sup> from skin (middle row) and blood (lower row) are shown. Data are representative from 4 independent experiments.

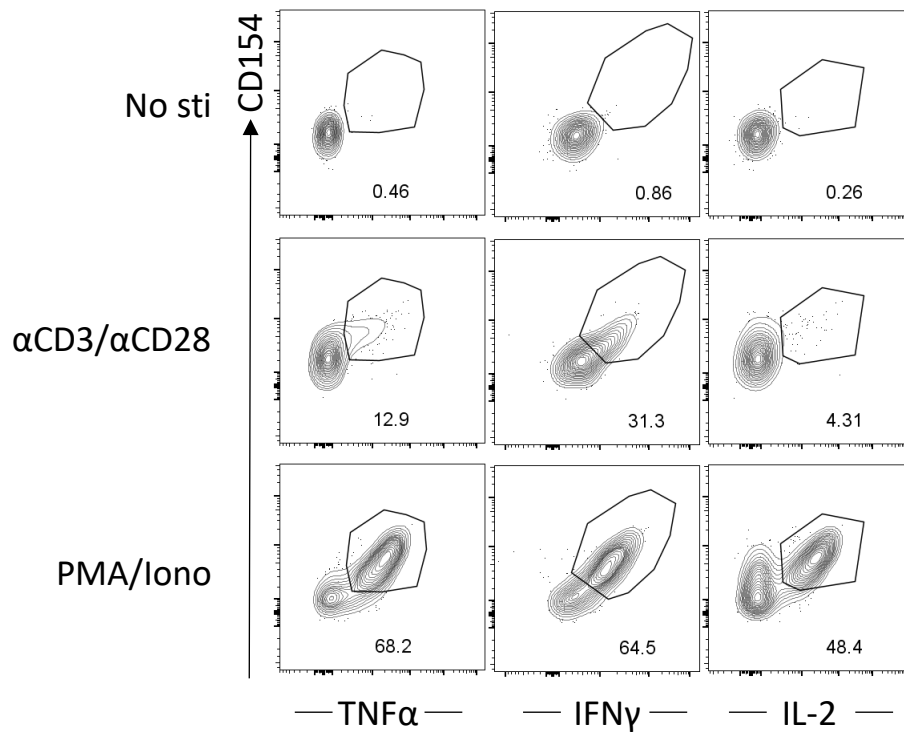

**Supplementary Figure 7. Functional profiling of poly-reactive CD4<sup>+</sup> T cells from the human skin.** Skin cells were isolated using the M.CoIV\_6h method and cultured in medium alone, stimulated with plate-bound anti-CD3/CD28, or PMA/Iono for 7 hours, with Brefeldin A added during the last 2 hours. Cells were then analyzed for intracellular cytokines, TNF- $\alpha$ , IFN- $\gamma$ , or IL-2. Contour plots of cytokines e.g. TNF- $\alpha$ , IFN- $\gamma$ , or IL-2 that co-express with CD154 on memory CD4<sup>+</sup> skin T cells.

## 1.2 Supplementary Tables

| Sample No. | Donor | Gender | Age (y) | Location  | paired blood |
|------------|-------|--------|---------|-----------|--------------|
| 1          | Sk1   | M      | 49      | Eyelid    | no           |
| 2          | Sk2   | F      | 66      | Eyelid    | no           |
| 3          | Sk9   | F      | 71      | Eyelid    | yes          |
| 4          | Sk10  | F      | 69      | Eyelid    | no           |
| 5          | Sk11  | F      | 83      | Eyelid    | yes          |
| 6          | Sk12  | F      | 83      | Eyelid    | no           |
| 7          | Sk13  | F      | 54      | Eyelid    | yes          |
| 8          | Sk14  | F      | 54      | Eyelid    | no           |
| 9          | Sk17  | M      | 74      | Eyelid    | yes          |
| 10         | Sk18  | F      | 60      | Eyelid    | yes          |
| 11         | Sk19  | F      | 60      | Eyelid    | no           |
| 12         | Sk20  | M      | 74      | Eyelid    | no           |
| 13         | Sk21  | n.a.   | 40      | Inner leg | yes          |
| 14         | Sk22  | F      | 35      | Abdomen   | no           |
| 15         | Sk33  | F      | 57      | Eyelid    | yes          |
| 16         | Sk34  | F      | 63      | Eyelid    | no           |
| 17         | Sk35  | F      | 60      | Eyelid    | no           |
| 18         | Sk36  | F      | 82      | Eyelid    | yes          |
| 19         | Sk40  | F      | 63      | Arm       | yes          |
| 20         | Sk41  | F      | 54      | Breast    | no           |
| 21         | Sk44  | M      | 77      | Eyelid    | yes          |
| 22         | Sk45  | F      | 73      | Eyelid    | no           |
| 23         | Sk56  | M      | 67      | Eyelid    | no           |
| 24         | Sk57  | F      | 80      | Eyelid    | yes          |
| 25         | Sk58  | F      | 38      | Abdomen   | no           |
| 26         | Sk59  | F      | 51      | Eyelid    | yes          |
| 27         | Sk60  | M      | 79      | Eyelid    | yes          |
| 28         | Sk61  | F      | 25      | Breast    | no           |

|    |      |   |    |         |     |
|----|------|---|----|---------|-----|
| 29 | Sk64 | F | 55 | Abdomen | no  |
| 30 | Sk66 | F | 57 | Eyelid  | no  |
| 31 | Sk67 | F | 46 | Abdomen | no  |
| 32 | Sk71 | F | 71 | Eyelid  | no  |
| 33 | Sk72 | F | 71 | Eyelid  | yes |
| 34 | Sk73 | F | 43 | Breast  | no  |
| 35 | Sk74 | F | 81 | Eyelid  | no  |
| 36 | Sk75 | M | 61 | Eyelid  | no  |
| 37 | Sk76 | F | 63 | Eyelid  | no  |
| 38 | Sk77 | F | 55 | Eyelid  | no  |

**Supplementary Table 1. Donor information.** Sample/donor ID, sex, age, skin sample location and blood pairing information are shown. F: female, M: male, n.a.: not available. (n = 38).

| <b>Protocols tested</b> | <b>Components</b>                                                                                                                                                        | <b>Digestion medium</b> | <b>Digestion time</b> |
|-------------------------|--------------------------------------------------------------------------------------------------------------------------------------------------------------------------|-------------------------|-----------------------|
| M. CoIV_12h             | 0.8 mg/mL Collagenase IV, 0.02 mg/mL DNase I                                                                                                                             | RPMI1640                | 12 hours              |
| M. CoIV_6h              | 0.8 mg/mL Collagenase IV, 0.02 mg/mL DNase I                                                                                                                             | RPMI1640                | 6 hours               |
| WSD+EnzP_12h            | 50 $\mu$ L Enzyme D, 2.5 $\mu$ L Enzyme A, 12.5 $\mu$ L Enzyme P                                                                                                         | 435 $\mu$ L buffer L    | 12 hours              |
| WSD-EnzP_12h            | 50 $\mu$ L Enzyme D, 2.5 $\mu$ L Enzyme A                                                                                                                                | 435 $\mu$ L buffer L    | 12 hours              |
| CoP+IV_12h              | 0.4 mg/mL Collagenase P (w/o 0.4 mg/mL Collagenase IV), 0.02 mg/mL DNase I                                                                                               | RPMI1640                | 12 hours              |
| Cocktail_3h             | 1.25 mg/mL Collagenase I, 0.5 mg/mL Elastase, 0.5 mg/mL Hyaluronidase, 0.1 mg/mL trypsin inhibitor, 3.2 mM $\text{CaCl}_2 \cdot 2\text{H}_2\text{O}$ , 0.1 mg/mL DNase I | DMEM                    | 3 hours               |

**Supplementary Table 2. Composition and enzymatic digestion time of different protocols.**

Protocols, components, digestion medium and time are listed.
